# Supplementary material
Source: PubMed Central journal article supplement (PMC7653379)
Supplement: rsif20200691supp1.pdf [file rsif20200691supp1.pdf]

## I. APPEARANCE OF DENGUE

The following figures show the appearance of dengue cases per week for each peak year

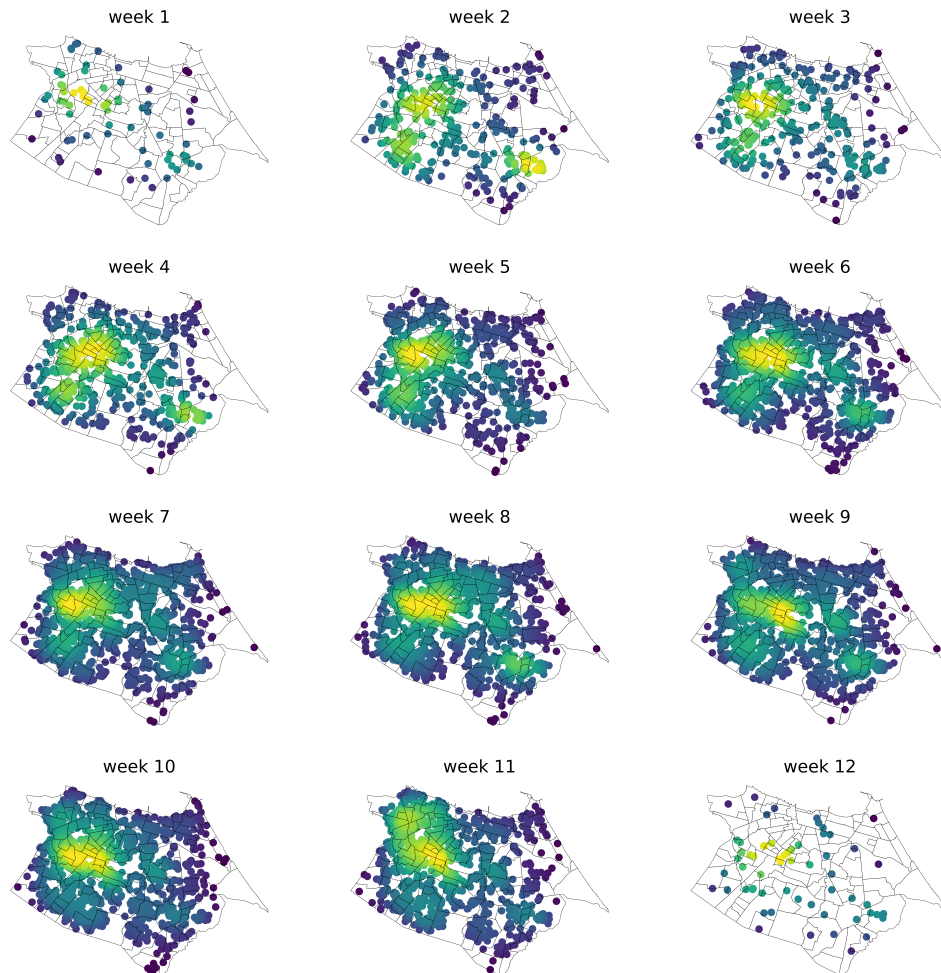

Figure 1. Appearance of dengue cases from week 1 to 12 for the year 2008

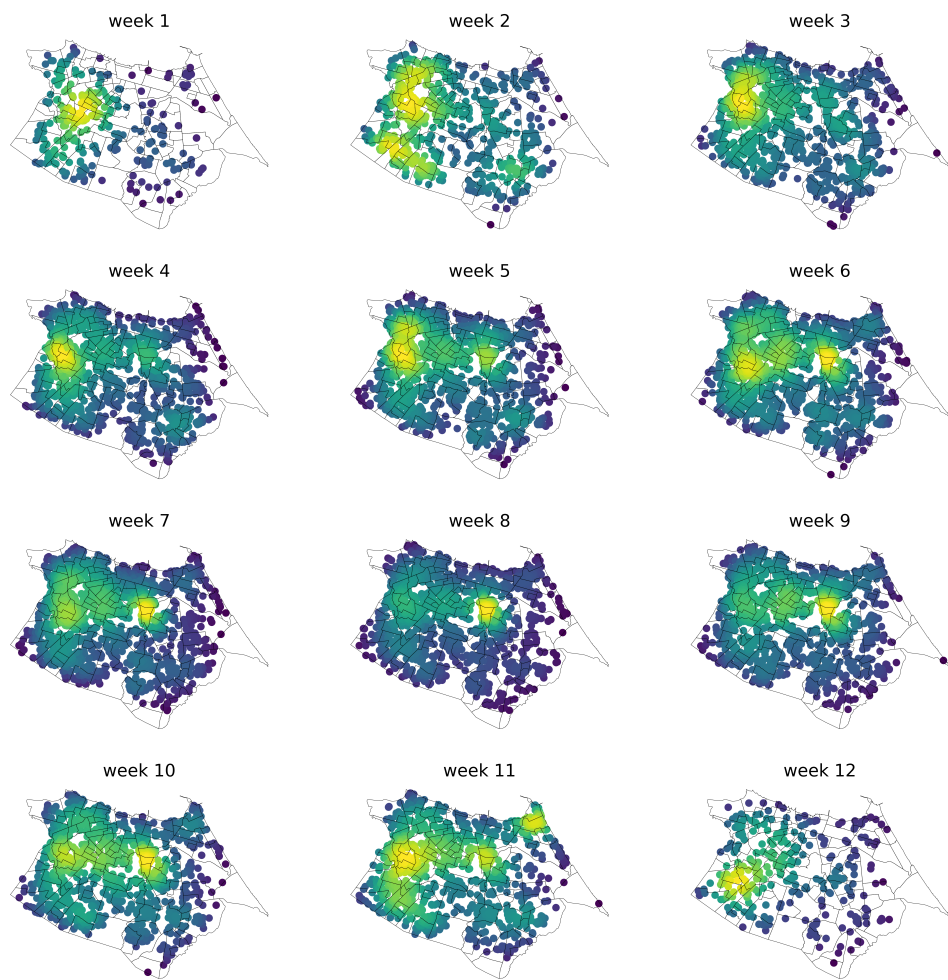

Figura 2. Appearance of dengue cases from week 1 to 12 for the year 2011

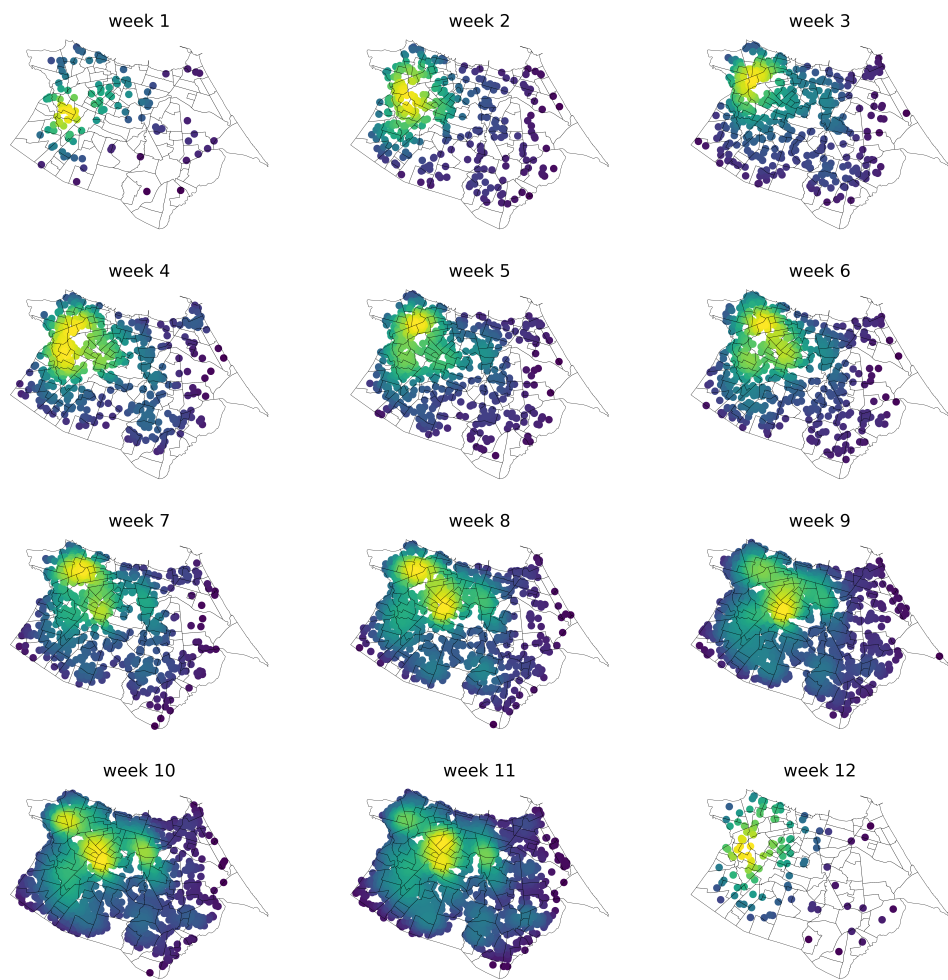

Figura 3. Appearance of dengue cases from week 1 to 12 for the year 2012

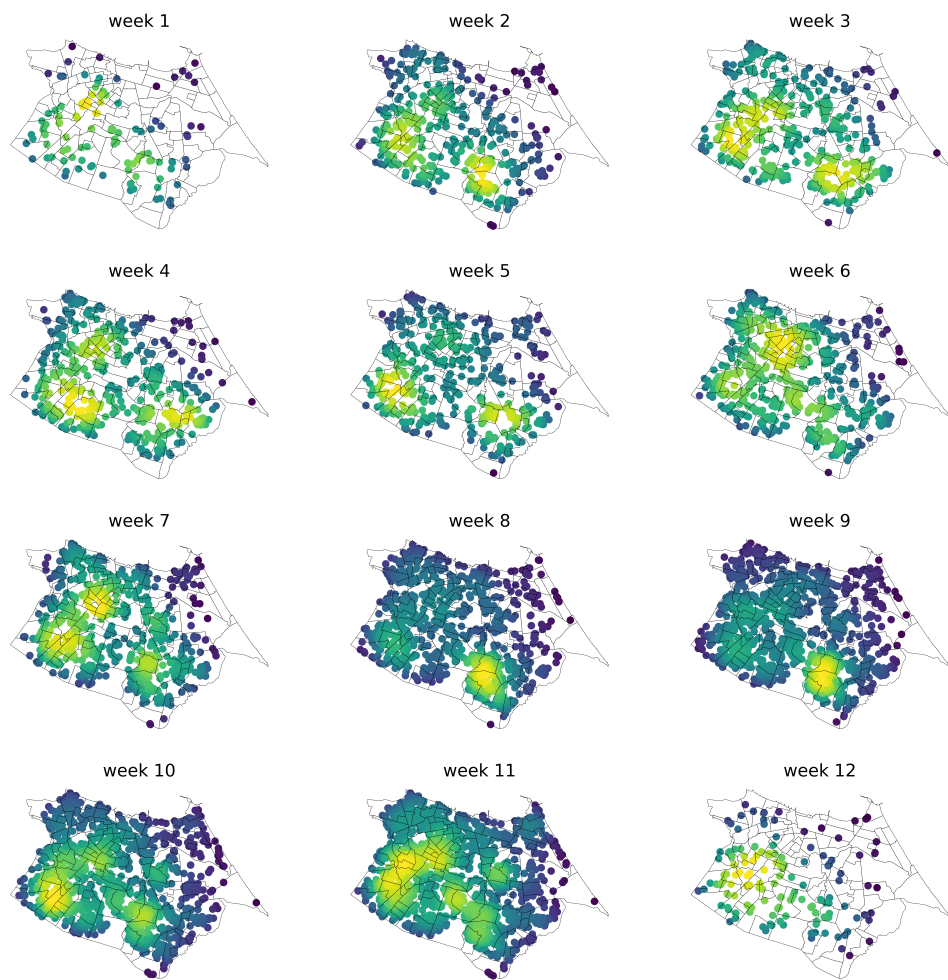

Figura 4. Appearance of dengue cases from week 1 to 12 for the year 2015
