# Supplementary material
Source: PubMed Central journal article supplement (PMC7653379)
Supplement: rsif20200691supp2.pdf [file rsif20200691supp2.pdf]

## I. AUTOCORRELATION ANALYSIS

Figure 1 shows the autocorrelation analysis for the dengue time series of all neighborhoods.

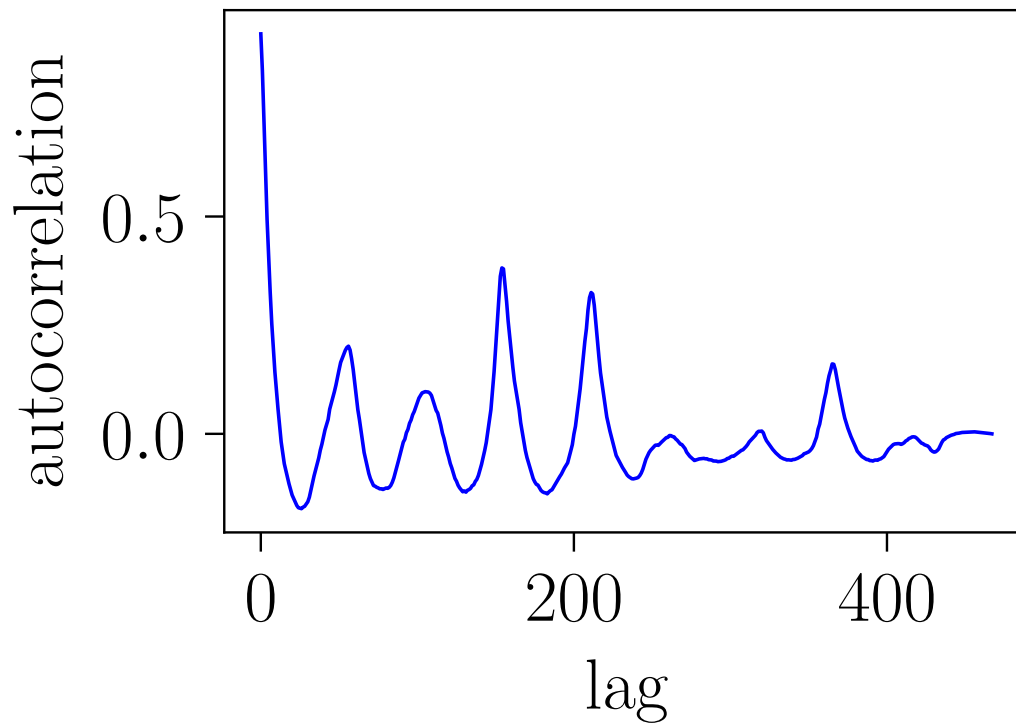

Figura 1. Autocorrelation analysis for dengue time series
