# Supplementary material
Source: PubMed Central journal article supplement (PMC7653379)
Supplement: rsif20200691supp4.pdf [file rsif20200691supp4.pdf]

# I. FORECAST EXAMPLES

Figure 1 and Figure 2 show, respectively, examples of predictions for the RNNc and MECHc models.

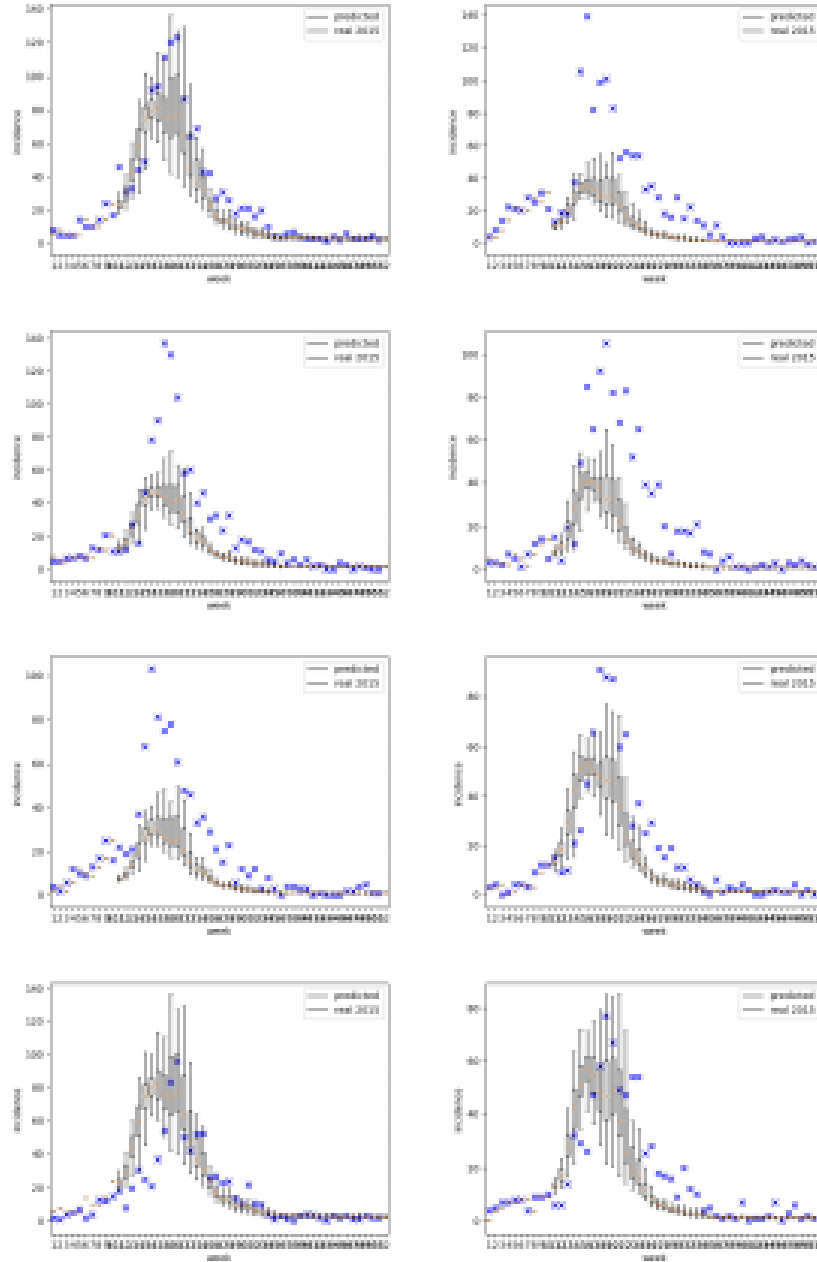

Figure 1. Neural Network Networked model predictions examples for 8 different neighborhoods for 2015 and with predictions starting at week 11.

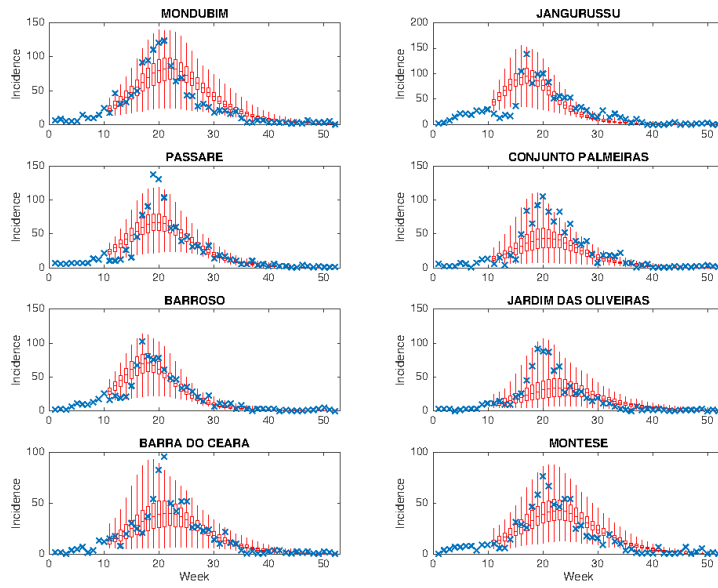

Figura 2. Mechanistic Networked model predictions examples for 8 different neighborhoods for 2015 and with predictions starting at week 11.
